# Supplementary material for: Fast-pulsing NMR techniques for the detection of weak interactions: successful natural abundance probe of hydrogen bonds in peptides
Source: Royal Society of Chemistry journal article supplement (doi:10.1039/c3ob41876f), 2013-01-01
Supplement: c3ob41876f.pdf [file c3ob41876f.pdf]

## **Fast-pulsing NMR techniques for the detection of weak interactions: successful natural abundance probe of hydrogen bonds in peptides**

A. Altmayer-Henzien,<sup>a</sup> V. Declerck,<sup>a</sup> D. J. Aitken,<sup>a</sup> E. Lescop,<sup>b</sup> D. Merlet,<sup>c</sup> and J. Farjon\*<sup>c</sup>

<sup>a</sup> Université Paris Sud, ICMMO UMR 8182 ESOM  
15 Rue Georges Clemenceau bât 420, Orsay, France.

<sup>b</sup> Centre de Recherche de Gif, Institut de Chimie des Substances Naturelles,  
CNRS, 1 avenue de la Terrasse, 91190 Gif-sur-Yvette, France.

<sup>c</sup> Université Paris Sud, ICMMO UMR 8182 ERMN  
15 Rue Georges Clemenceau bât 410, Orsay, France.

Fax: 0033(0)169158105

Tel: 0033(0)169154767

Email: jonathan.farjon@u-psud.fr

**Table 1:**  $^1\text{H}$   $T_1$  measurement with and without selective pulses

1/ Cyclosporin A in  $\text{CDCl}_3$

|                     | <b>Abu (2)</b> | <b>Ala (7)</b> | <b>Val (5)</b> | <b>D-Ala (8)</b> |
|---------------------|----------------|----------------|----------------|------------------|
| $T_1$ hard (s)      | 0.86           | 0.78           | 0.98           | 1.18             |
| $T_1$ selective (s) | 0.73           | 0.69           | 0.83           | 1.00             |

2/ Octamer in pyridine- $d_5$

|                     | <b>2</b> | <b>4</b> | <b>5,6</b> | <b>8</b> | <b>1</b> | <b>7,3</b> |
|---------------------|----------|----------|------------|----------|----------|------------|
| $T_1$ hard (s)      | 1.82     | 1.36     | 1.52       | 1.63     | 1.75     | 1.58       |
| $T_1$ selective (s) | 1.24     | 0.99     | 0.85       | 0.83     | 0.87     | 0.89       |

**Ernst angle optimization**

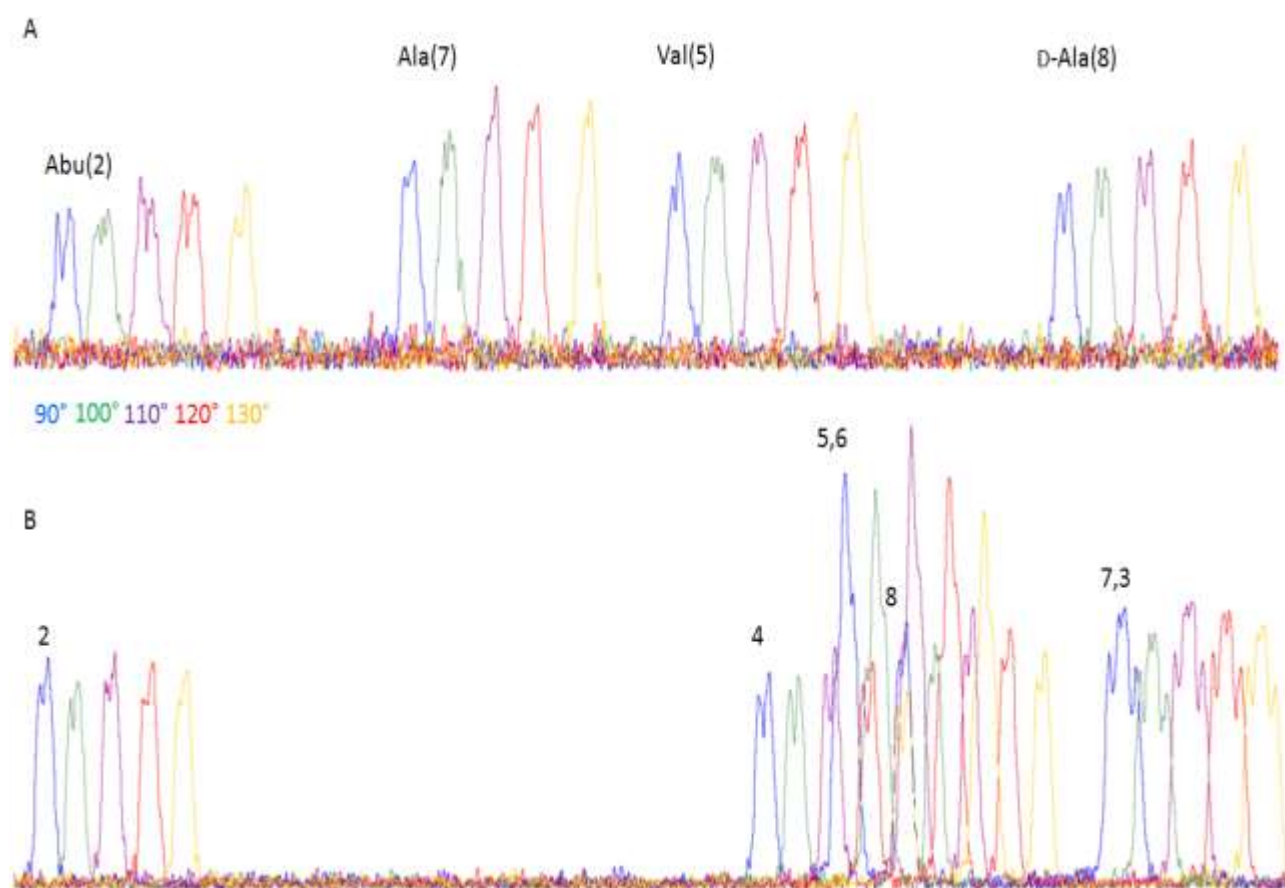

**Figure SI-1** Comparison of different excitation angle ( $\alpha$ ) ( $90^\circ$  to  $130^\circ$  from the left to the right) on the intensity of signals for the cyclosporin A (panel A) and the octamer (panel B) (see Figure 2). For each molecule an optimized excitation angle leading to the best sensitivity has been chosen to  $110^\circ$ .

### ***Theoretical part on the calculation of the best excitation angle***

Ernst *et al.* [1] have shown that the optimal flip angle can be predicted from equation 1:<sup>1,2</sup>

$$\cos(180 - \alpha) = \exp(-(aq + t_{\text{rec}})/T_1) \quad (\text{eq. 1})$$

Thus, the optimal excitation angle  $\alpha^{\text{opt}}$  for the SOFAST HMBC can be expressed as following:

$$\alpha^{\text{opt}} = 180 - \text{Arccos}[\exp(-T_{\text{rep}}/T_1)] \quad (\text{eq. 2})$$

In Table 2 are compared theoretical and experimental values of the  $\alpha$  angles for each compound. The experimentally optimized values from the most intense  $^1\text{H}$  signals were collected. The error of about  $\pm 10^\circ$  for the experimental  $\alpha$  angle ( $\alpha^{\text{exp}}$ ) comes mainly from errors on the  $90^\circ$  pulse calibration. Uncertainties of  $\pm 5^\circ$  on the calculated  $\alpha$  angle ( $\alpha^{\text{th}}$ ) from equation 1 are due to errors on  $T_1$  values ( $\pm 0.10$  s) measured with the selective version of the inversion recovery.  $\alpha^{\text{exp}}$  and  $\alpha^{\text{th}}$  are in agreement by considering errors on their measurement and calculation, respectively.

***Table 2: Comparison between experimental and theoretical  $\alpha$  angle values***

For the cyclosporin A

| $T_1$ ( $\text{H}^{\text{N}}_2$ ) (s) | $T_{\text{rep}}$ (s) | $\alpha^{\text{exp}}$ ( $^\circ$ ) | $\alpha^{\text{th}}$ ( $^\circ$ ) |
|---------------------------------------|----------------------|------------------------------------|-----------------------------------|
| $0.73 \pm 0.10$                       | 0.43                 | $110 \pm 10$ (see Fig.SI 1 A)      | $123 \pm 5$                       |
| $T_1$ ( $\text{H}^{\text{N}}_7$ ) (s) | $T_{\text{rep}}$ (s) | $\alpha^{\text{exp}}$ ( $^\circ$ ) | $\alpha^{\text{th}}$ ( $^\circ$ ) |
| $0.69 \pm 0.10$                       | 0.43                 | $110 \pm 10$ (see Fig. SI 1 A)     | $122 \pm 5$                       |
| $T_1$ ( $\text{H}^{\text{N}}_5$ ) (s) | $T_{\text{rep}}$ (s) | $\alpha^{\text{exp}}$ ( $^\circ$ ) | $\alpha^{\text{th}}$ ( $^\circ$ ) |
| $0.83 \pm 0.10$                       | 0.43                 | $130 \pm 10$ (see Fig.SI 1A)       | $126 \pm 5$                       |
| $T_1$ ( $\text{H}^{\text{N}}_8$ ) (s) | $T_{\text{rep}}$ (s) | $\alpha^{\text{exp}}$ ( $^\circ$ ) | $\alpha^{\text{th}}$ ( $^\circ$ ) |
| $1.0 \pm 0.10$                        | 0.43                 | $120 \pm 10$ (see Fig. SI 1 A)     | $130 \pm 5$                       |

For the  $\beta$ -peptide

|                         |               |                                      |                            |
|-------------------------|---------------|--------------------------------------|----------------------------|
| $T_1$ ( $H^{N_2}$ ) (s) | $T_{rep}$ (s) | $\alpha^{exp}$ ( $^\circ$ )          | $\alpha^{th}$ ( $^\circ$ ) |
| $1.24 \pm 0.10$         | 0.43          | $110 - 120 \pm 10$ (see Fig.SI 1 B)  | $135 \pm 5$                |
| $T_1$ ( $H^{N_4}$ ) (s) | $T_{rep}$ (s) | $\alpha^{exp}$ ( $^\circ$ )          | $\alpha^{th}$ ( $^\circ$ ) |
| $0.99 \pm 0.10$         | 0.43          | $110 - 120 \pm 10$ (see Fig. SI 1 B) | $130 \pm 5$                |
| $T_1$ ( $H^{N_5}$ ) (s) | $T_{rep}$ (s) | $\alpha^{exp}$ ( $^\circ$ )          | $\alpha^{th}$ ( $^\circ$ ) |
| $0.85 \pm 0.10$         | 0.43          | $110 \pm 10$ (see Fig.SI 1 B)        | $127 \pm 5$                |
| $T_1$ ( $H^{N_6}$ ) (s) | $T_{rep}$ (s) | $\alpha^{exp}$ ( $^\circ$ )          | $\alpha^{th}$ ( $^\circ$ ) |
| $0.85 \pm 0.10$         | 0.43          | $110 \pm 10$ (see Fig. SI 1 B)       | $127 \pm 5$                |
| $T_1$ ( $H^{N_8}$ ) (s) | $T_{rep}$ (s) | $\alpha^{exp}$ ( $^\circ$ )          | $\alpha^{th}$ ( $^\circ$ ) |
| $0.83 \pm 0.10$         | 0.43          | $110 - 120 \pm 10$ (see Fig.SI 1 B)  | $126 \pm 5$                |
| $T_1$ ( $H^{N_7}$ ) (s) | $T_{rep}$ (s) | $\alpha^{exp}$ ( $^\circ$ )          | $\alpha^{th}$ ( $^\circ$ ) |
| $0.87 \pm 0.10$         | 0.43          | $110 - 120 \pm 10$ (see Fig. SI 1 B) | $127 \pm 5$                |
| $T_1$ ( $H^{N_3}$ ) (s) | $T_{rep}$ (s) | $\alpha^{exp}$ ( $^\circ$ )          | $\alpha^{th}$ ( $^\circ$ ) |
| $0.87 \pm 0.10$         | 0.43          | $110 - 120 \pm 10$ (see Fig. SI 1 B) | $127 \pm 5$                |

**Effect of the signal truncation on the detection of  $H^N \cdots OC$  H-bonds:**

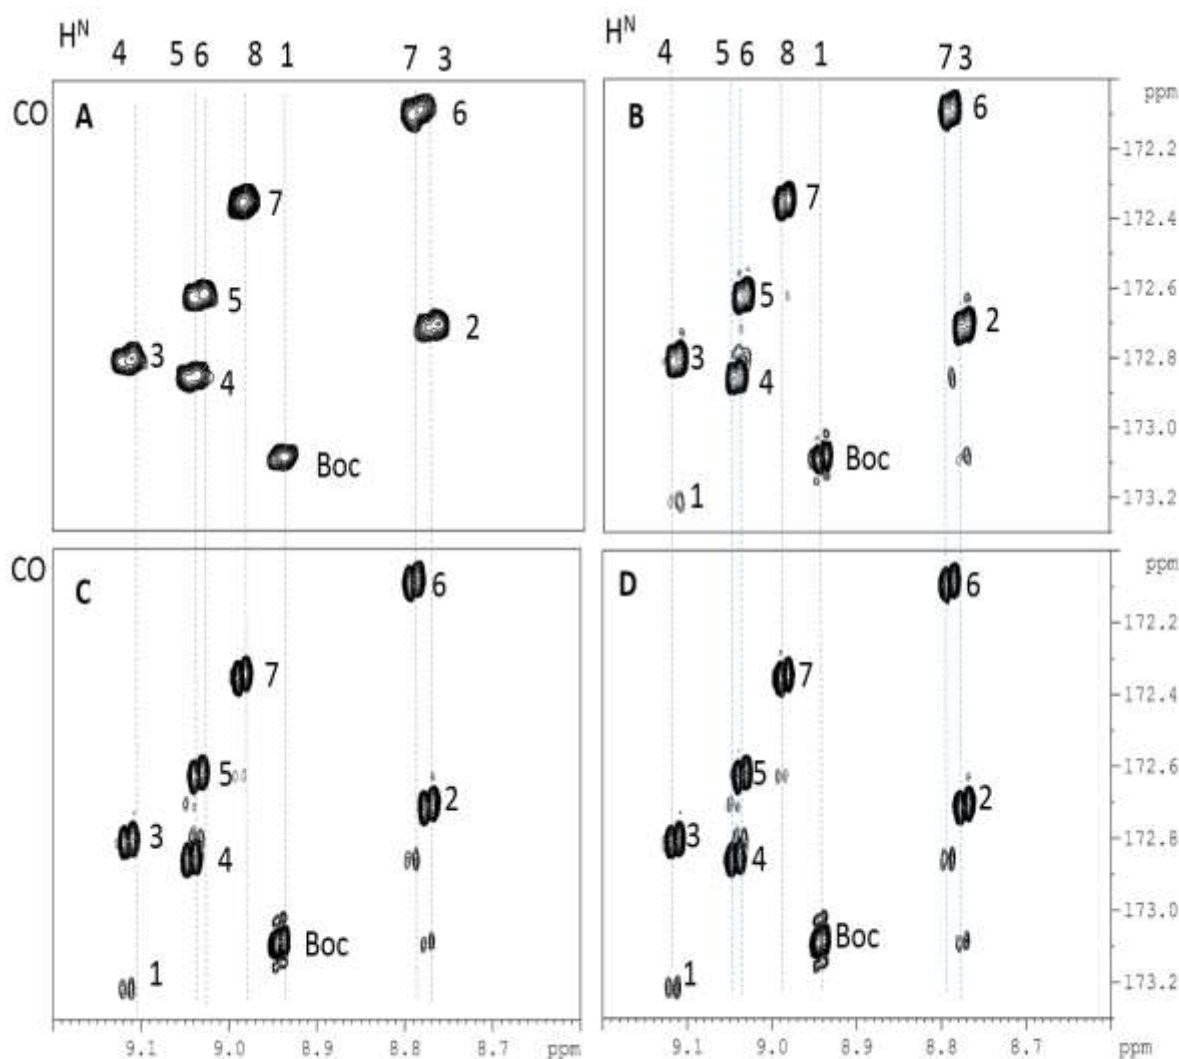

**Figure SI-2**  $H^N$ -CO SOFAST HMBC recorded maps on the octamer (see Figure 2) in pyridine- $d_5$  with different truncation level corresponding to acquisition time (aq): A. 107 ms, B. 215 ms, C. 322 ms, D. 430 ms. A long range delay  $\Delta$  of 200 ms was used for  $^h_2J_{NH \cdots OC}$  couplings to prevent lost in sensitivity due to the transverse relaxation. For  $aq=107$  ms all correlation peaks due to  $^2J_{HN-CO}$  are visible but not the ones coming from the evolution of  $^h_2J_{NH \cdots OC}$ . For  $aq = 215$  ms  $H^N(4) \cdots CO(1)$ ,  $H^N(6) \cdots OC(3)$ , and  $H^N(3) \cdots OC(Boc)$  start appearing. For  $aq = 322$  ms,  $H^N(5) \cdots CO(2)$ ,  $H^N(8) \cdots CO(5)$  appear and other  $H^N \cdots CO$  get a higher sensitivity. Finally the optimum  $aq = 430$  ms allowed detecting all H bonds correlations.

**References**

1. R. Ernst and W. Anderson, *Rev. Sci. Instrum.* 1966, **37**, 93.
2. R., Ernst, G. Bodenhausen and A. Wokaun, *Principles of Nuclear Magnetic Resonances in One and Two Dimensions*, Oxford, Science Publications, 1987
